# Supplementary material
Source: Elsevier journal article supplement (https://www.sciencedirect.com/science/article/pii/S0210570520302776)
Supplement: mmc2 [file S0210570520302776:mmc2.doc]

GASTROHEPATO-D-20-00180. REVISADO

Supplementary table 2. Univariate analysis. Variables associated with poor bowel cleansing

|  | BBPS<2  (n=30) | BBPS≥2  (n=105) | OR (95%CI) |
| --- | --- | --- | --- |
| Age, (mean, SD) | 69.4(11.8) | 66.2(11.5) | 1.02(0.99-1.07) |
| Sex (male), n (%) [95% C] | 11 (36.1) | 55 (52.5) | 1.9(0.82-4.39) |
| BMI§, (mean, SD) | 28.8 (5.0) | 29.1 (4.8) | 1.0(0.93-1.11) |
| Education¶, n (%) | 28 (93.3) | 76 (72.4) | 5.3(1.2-23.87) |
| FDRs†, n (%) | 1 (3.3) | 16 (15.2) | 0.2(0.02-1.51) |
| ECOG¥ >1, n (%)  Indications, n (%)  Positive faecal occult blood test  Postpolypectomy surveillance  Change of bowel habit  Anaemia  Rectal bleeding  Abdominal pain  Others | 5 (16.7)  9 (30.0)  3 (10.0)  1 (3.3)  10 (33.3)  2 (6.7)  4 (13.3)  1 (3.3) | 15 (14.3)  29 (27.6)  26 (24.8)  10 (9.5)  14 (13.3)  6 (5.7)  7 (6.7)  13 (12.4) | 1.2(0.40-3.62)  0.9(0.37-2.17)  0.3(0.09-1.20)  0.8(0.34-2.09)  3.2(1.26-8.33)  0.9(0.16-4.44)  0.5(0.13-1.71)  5.0(0.51-32.35) |
| Comorbidity, n (%) |  |  |  |
| Diabetes | 16 (53.3) | 62 (59.2) | 0.8(0.35-1.79) |
| Stroke | 6 (20) | 8 (7.6) | 3.0(1.43-12.82) |
| Cirrhosis | 1 (1.6) | 4 (1.2) | 0.8(0.96-9.52) |
| Chronic renal failure  Hypertension | 3 (10)  13 (43.3) | 10 (9.5)  44 (41.9) | 1.1(0.27-4.12)  0.9(0.42-2.14) |
| Constipation | 19 (63.3) | 35 (33.3) | 3.5(1.84-8.06) |
| Abdominal/pelvic surgery | 15 (50.0) | 51 (48.6) | 0.9(0.42-2.13) |
|  |  |  |  |
| Medical treatment, n (%) |  |  |  |
| Opioids | 2 (6.7) | 10 (9.5) | 0.7(0.14-3.28) |
| Calcium antagonists | 8 (26.7) | 21 (20.0) | 1.5(0.57-3.72) |
| Antidepressants | 2 (6.7) | 19 (18.1) | 3.1(0.68-14.12) |
| Non-Adherence to diet, n (%) | 30 (100) | 105 (100) |  |
| Bowel preparation adherence, n (%) | 30 (100) | 105 (100) |  |
| Group (1 day-LRD), n (%) | 34 (59.8) | 162 (49.4) | 1.2(0.72-2.15) |
| Dissatisfaction with the diet, n (%) | 8 (26.7) | 12 (11.4) | 2.8 (1.03-7.72) |
| Difficulties to follow the diet, n (%) | 8 (26.7) | 19 (18.1) | 1.7(0.64-4.25) |
| Adverse effects, n (%) | 13 (43.3) | 36 (34.3) | 0.7(0.30-1.56) |
