# Supplementary material
Source: Elsevier journal article supplement (https://www.sciencedirect.com/science/article/pii/S0210570520302776)
Supplement: mmc3 [file S0210570520302776:mmc3.doc]

Supplementary table 3. Logistic regression analysis. Variables associated with poor bowel cleansing.

|  | **OR? (95% CI‡)** |
| --- | --- |
| Anaemia  (Ref: No anaemia) | 3.1 (1.11-8.70) |
| Constipation  (Ref: No constipation) | 3.8 (1.48-10) |
| Stroke  (Ref: No stroke) | 5.6 (1.42-21.74) |
| Dissatisfaction with the diet  (Ref: satisfaction with the diet) | 2.4 (0.76-7.48) |
| Not adenoma surveillance  (Ref: adenoma surveillance) | 1.3 (0.32-5.48) |
| Low education  (Ref §: High education) | 4.5 (0.92-21.86) |
| Not having family history  (Ref: family history) | [only 6 cases with family history, not  included in the model] |
